# Supplementary material for: The Association between Serum Lipids and Intraocular Pressure in 2 Large United Kingdom Cohorts
Source: PubMed Central journal article supplement — Ophthalmology. 2022 Sep;129(9):986–96. doi: 10.1016/j.ophtha.2022.04.023 (PMC10444694; doi:10.1016/j.ophtha.2022.04.023), 2022-09
Supplement: mmc1.pdf [file mmc1.pdf]

**Supplementary Table S1** – Pearson correlation between serum lipids in UK Biobank and EPIC-Norfolk cohorts

|                            | HDL-C  | LDL-C | TG    | TC   |
|----------------------------|--------|-------|-------|------|
| <b><i>UK Biobank</i></b>   |        |       |       |      |
| HDL-C                      | 1.00   |       |       |      |
| LDL-C                      | 0.09*  | 1.00  |       |      |
| TG                         | -0.44* | 0.24* | 1.00  |      |
| TC                         | 0.34*  | 0.95* | 0.22* | 1.00 |
| <b><i>EPIC-Norfolk</i></b> |        |       |       |      |
| HDL-C                      | 1.00   |       |       |      |
| LDL-C                      | 0.15*  | 1.00  |       |      |
| TG                         | -0.45  | -0.01 | 1.00  |      |
| TC                         | 0.34*  | 0.94* | 0.15* | 1.00 |

\* $P < 0.05$

LDL-C was derived using the Friedewald formula
