# Supplementary material for: The Association between Serum Lipids and Intraocular Pressure in 2 Large United Kingdom Cohorts
Source: PubMed Central journal article supplement — Ophthalmology. 2022 Sep;129(9):986–96. doi: 10.1016/j.ophtha.2022.04.023 (PMC10444694; doi:10.1016/j.ophtha.2022.04.023), 2022-09
Supplement: mmc2.pdf [file mmc2.pdf]

**Supplementary Table S2.** Univariable associations between serum lipid levels and corneal-compensated intraocular pressure (IOPcc) in UK Biobank and EPIC Norfolk cohorts

| Serum lipid levels (mmol/L)           | UK Biobank |                |                 | EPIC-Norfolk |               |                 |
|---------------------------------------|------------|----------------|-----------------|--------------|---------------|-----------------|
|                                       | $\beta$    | (95% CI)       | <i>P</i> -value | $\beta$      | (95% CI)      | <i>P</i> -value |
| Total cholesterol (per unit increase) | 0.10       | (0.08, 0.12)   | <0.001          | 0.15         | (0.06, 0.23)  | 0.001           |
| Total cholesterol in quartiles        |            |                |                 |              |               |                 |
| Q1                                    | Ref        |                |                 | Ref          |               |                 |
| Q2                                    | 0.10       | (0.04, 0.15)   | 0.002           | 0.16         | (-0.11, 0.43) | 0.24            |
| Q3                                    | 0.18       | (0.12, 0.24)   | <0.001          | 0.13         | (-0.14, 0.41) | 0.34            |
| Q4                                    | 0.29       | (0.23, 0.35)   | <0.001          | 0.38         | (0.11, 0.65)  | 0.006           |
| <i>P</i> for trend                    |            |                | <0.001          |              |               | 0.011           |
| HDL-C (per unit increase)             | 0.04       | (-0.02, 0.10)  | 0.15            | 0.17         | (-0.06, 0.41) | 0.15            |
| HDL-C in quartiles                    |            |                |                 |              |               |                 |
| Q1                                    | Ref        |                |                 | Ref          |               |                 |
| Q2                                    | 0.05       | (-0.007, 0.11) | 0.08            | 0.06         | (-0.21, 0.33) | 0.66            |
| Q3                                    | 0.04       | (-0.02, 0.10)  | 0.20            | 0.18         | (-0.09, 0.46) | 0.19            |
| Q4                                    | 0.04       | (-0.02, 0.10)  | 0.14            | 0.09         | (-0.18, 0.36) | 0.53            |
| <i>P</i> for trend                    |            |                | 0.63            |              |               | 0.38            |
| LDL-C (per unit increase)             | 0.13       | (0.10, 0.15)   | <0.001          | 0.16         | (0.06, 0.26)  | 0.001           |
| LDL in quartiles                      |            |                |                 |              |               |                 |
| Q1                                    | Ref        |                |                 | Ref          |               |                 |
| Q2                                    | 0.05       | (-0.01, 0.11)  | 0.10            | 0.07         | (-0.18, 0.33) | 0.58            |
| Q3                                    | 0.15       | (0.09, 0.21)   | <0.001          | 0.14         | (-0.12, 0.40) | 0.30            |
| Q4                                    | 0.27       | (0.21, 0.33)   | <0.001          | 0.49         | (0.20, 0.79)  | 0.001           |
| <i>P</i> for trend                    |            |                | <0.001          |              |               | 0.002           |
| Triglycerides (per unit increase)     | 0.08       | (0.05, 0.10)   | <0.001          | -0.01        | (-0.13, 0.12) | 0.91            |
| Triglycerides in quartiles            |            |                |                 |              |               |                 |
| Q1                                    | Ref        |                |                 | Ref          |               |                 |
| Q2                                    | 0.24       | (0.18, 0.29)   | <0.001          | 0.18         | (-0.9, 0.45)  | 0.19            |
| Q3                                    | 0.29       | (0.23, 0.35)   | <0.001          | 0.13         | (-0.14, 0.40) | 0.34            |
| Q4                                    | 0.26       | (0.20, 0.32)   | <0.001          | 0.03         | (-0.24, 0.31) | 0.81            |
| <i>P</i> for trend                    |            |                | <0.001          |              |               | 0.87            |

Quartiles in UK Biobank are defined as follows: for TC: Q1  $\leq$  4.88, Q2 4.89-5.62, Q3 5.63-6.39, Q4  $\geq$  6.40; for HDL-C: Q1  $\leq$  1.18, Q2 1.19-1.41, Q3 1.42-1.69, Q4  $\geq$  1.70; for LDL-C: Q1  $\leq$  2.92, Q2 2.93-3.48, Q3 3.49-4.08, Q4  $\geq$  4.09, for TG: Q1  $\leq$  1.02, Q2 1.03-1.44, Q3 1.45-2.07, Q4  $\geq$  2.08. Quartiles for EPIC-Norfolk are defined as follows: for TC: Q1  $\leq$  4.67, Q2 4.68-5.49, Q3 5.50 - 6.19, Q4  $\geq$  6.20- 10.20; for HDL-C: Q1  $\leq$  1.21, Q2 1.22 - 1.46, Q3 1.47 - 1.77, Q4  $\geq$  1.78 for LDL-C: Q1  $\leq$  2.46, Q2 2.47 - 3.14, Q3 3.15 - 3.83, Q4  $\geq$  3.84 for TG: Q1  $\leq$  1.19, Q2 1.20 to 1.57, Q3 1.58 to 2.19, Q4  $\geq$  2.20
