# Supplementary material for: The Association between Serum Lipids and Intraocular Pressure in 2 Large United Kingdom Cohorts
Source: PubMed Central journal article supplement — Ophthalmology. 2022 Sep;129(9):986–96. doi: 10.1016/j.ophtha.2022.04.023 (PMC10444694; doi:10.1016/j.ophtha.2022.04.023), 2022-09
Supplement: mmc3.pdf [file mmc3.pdf]

**Supplementary Table S3-** Multivariable adjusted associations between lipid serum and corneal compensated IOP (IOPcc) in UK Biobank cohort only, stratified by sex

| Serum lipid levels (mmol/L)       | Women (44 286) |             |                 | Men (50 037) |              |                 |
|-----------------------------------|----------------|-------------|-----------------|--------------|--------------|-----------------|
|                                   | <i>B</i>       | 95% CI      | <i>P</i> -value | <i>B</i>     | 95% CI       | <i>P</i> -value |
| <b>Total cholesterol (mmol/L)</b> |                |             |                 |              |              |                 |
| Per SD increase                   | 0.07           | 0.04; 0.10  | <0.001          | 0.10         | 0.07; 0.14   | <0.001          |
| Q1 (<5.10)                        | Ref            | .           | .               | Ref          | .            | .               |
| Q2 (5.10-5.82)                    | 0.14           | 0.07; 0.22  | <0.001          | 0.15         | 0.06; 0.24   | 0.001           |
| Q3 (5.82-6.56)                    | 0.15           | 0.07; 0.23  | <0.001          | 0.20         | 0.11; 0.29   | <0.001          |
| Q4 (>6.56)                        | 0.21           | 0.13; 0.29  | <0.001          | 0.27         | 0.17; 0.36   | <0.001          |
| <i>P</i> -trend                   |                |             | <0.001          |              |              | <0.001          |
| <b>HDL-C (mmol/L)</b>             |                |             |                 |              |              |                 |
| Per SD increase                   | 0.08           | 0.05; 0.11  | <0.001          | 0.13         | 0.10; 0.16   | <0.001          |
| Q1 (<1.35)                        | Ref            | .           | .               | Ref          | .            | .               |
| Q2 (1.35-1.57)                    | 0.07           | 0.00; 0.15  | 0.061           | 0.07         | -0.02; 0.15  | 0.131           |
| Q3 (1.57-1.83)                    | 0.11           | 0.03; 0.19  | 0.007           | 0.23         | 0.15; 0.32   | <0.001          |
| Q4 (>1.83)                        | 0.19           | 0.11; 0.27  | <0.001          | 0.32         | 0.23; 0.41   | <0.001          |
| <i>P</i> -trend                   |                |             | <0.001          |              |              | <0.001          |
| <b>LDL-C (mmol/L)</b>             |                |             |                 |              |              |                 |
| Per SD increase                   | 0.06           | 0.03; 0.09  | <0.001          | 0.09         | 0.05; 0.12   | <0.001          |
| Q1 (<3.01)                        | Ref            | .           | .               | Ref          | .            | .               |
| Q2 (3.01-3.56)                    | 0.08           | 0.00; 0.16  | 0.051           | 0.09         | -0.00; 0.18  | 0.051           |
| Q3 (3.56-4.15)                    | 0.10           | 0.02; 0.18  | 0.018           | 0.16         | 0.07; 0.25   | 0.001           |
| Q4 (>4.15)                        | 0.15           | 0.07; 0.23  | <0.001          | 0.22         | 0.13; 0.32   | <0.001          |
| <i>P</i> -trend                   |                |             |                 |              |              | <0.001          |
| <b>Triglycerides (mmol/L)</b>     |                |             |                 |              |              |                 |
| Per SD increase                   | -0.02          | -0.05; 0.01 | 0.199           | -0.08        | -0.11; -0.05 | <0.001          |
| Q1 (<0.96)                        | Ref            | .           | .               | Ref          | .            | .               |
| Q2 (0.96-1.31)                    | -0.01          | -0.09; 0.07 | 0.806           | -0.08        | -0.17; 0.01  | 0.073           |
| Q3 (1.31-1.84)                    | 0.02           | -0.06; 0.10 | 0.656           | -0.14        | -0.23; -0.06 | 0.001           |
| Q4 (>1.84)                        | -0.05          | -0.13; 0.03 | 0.254           | -0.22        | -0.31; -0.13 | <0.001          |
| <i>P</i> -trend                   |                |             |                 |              |              | <0.001          |
| <b>ApoA (g/L)</b>                 |                |             |                 |              |              |                 |
| Per SD increase                   | 0.09           | 0.06; 0.12  | <0.001          | 0.16         | 0.12; 0.19   | <0.001          |
| Q1 (≤1.46)                        | Ref            | .           | .               | Ref          | .            | .               |
| Q2 (1.46-1.62)                    | 0.18           | 0.08; 0.28  | <0.001          | 0.14         | 0.07; 0.22   | <0.001          |
| Q3 (1.62-1.80)                    | 0.14           | 0.05; 0.24  | 0.003           | 0.19         | 0.11; 0.28   | <0.001          |
| Q4 (>1.80)                        | 0.27           | 0.18; 0.36  | <0.001          | 0.39         | 0.29; 0.49   | <0.001          |
| <i>P</i> -trend                   |                |             | <0.001          |              |              | <0.001          |
| <b>ApoB (g/L)_</b>                |                |             |                 |              |              |                 |
| Per SD increase                   | 0.07           | 0.04; 0.10  | <0.001          | 0.10         | 0.06; 0.13   | <0.001          |
| Q1 (<0.87)                        | Ref            | .           | .               | Ref          | .            | .               |
| Q2 (0.87-1.02)                    | 0.03           | -0.04; 0.11 | 0.381           | 0.10         | 0.01; 0.19   | 0.026           |
| Q3 (1.02-1.18)                    | 0.10           | 0.02; 0.18  | 0.011           | 0.13         | 0.04; 0.22   | 0.004           |
| Q4 (>1.18)                        | 0.15           | 0.07; 0.24  | <0.001          | 0.24         | 0.15; 0.33   | <0.001          |
| <i>P</i> -trend                   |                |             | <0.001          |              |              | <0.001          |

---

Adjusted for age, ethnicity, Townsend deprivation index, body mass index, height, systolic blood pressure, smoking, alcohol and diabetes status, statin use, oral beta-blocker use and spherical equivalent. HDL-C; high density lipoprotein cholesterol; LDL-C – low density lipoprotein cholesterol; ApoA – Apolipoprotein A; ApoB – Apolipoprotein . a) sex interaction (baseline male)
