# Supplementary material for: The Association between Serum Lipids and Intraocular Pressure in 2 Large United Kingdom Cohorts
Source: PubMed Central journal article supplement — Ophthalmology. 2022 Sep;129(9):986–96. doi: 10.1016/j.ophtha.2022.04.023 (PMC10444694; doi:10.1016/j.ophtha.2022.04.023), 2022-09
Supplement: mmc4.pdf [file mmc4.pdf]

**Supplementary Table S4** Multivariable associations between lipid serum and Goldmann-correlated intraocular pressure (IOPg) in UK Biobank and EPIC Norfolk cohorts

| Serum lipid levels (mmol/L)         | UK Biobank |               |                 | EPIC-Norfolk |               |                 |
|-------------------------------------|------------|---------------|-----------------|--------------|---------------|-----------------|
|                                     | $\beta$    | (95% CI)      | <i>P</i> -value | $\beta$      | (95% CI)      | <i>P</i> -value |
| Total cholesterol (per SD increase) | 0.12       | (0.10, 0.14)  | <0.001          | 0.24         | (0.13, 0.36)  | <0.001          |
| Total cholesterol in quartiles      |            |               |                 |              |               |                 |
| Q1                                  | Ref        |               |                 | Ref          |               |                 |
| Q2                                  | 0.18       | (0.12, 0.25)  | <0.001          | 0.25         | (-0.03, 0.54) | 0.08            |
| Q3                                  | 0.26       | (0.20, 0.33)  | <0.001          | 0.34         | (0.03, 0.65)  | 0.033           |
| Q4                                  | 0.32       | (0.25, 0.38)  | <0.001          | 0.53         | (0.22, 0.86)  | 0.001           |
| <i>P</i> for trend                  |            |               | <0.001          |              |               | 0.001           |
| HDL-C (per SD increase)             | 0.11       | (0.08, 0.13)  | <0.001          | 0.17         | (0.06, 0.28)  | 0.003           |
| HDL-C in quartiles                  |            |               |                 |              |               |                 |
| Q1                                  | Ref        |               |                 | Ref          |               |                 |
| Q2                                  | 0.11       | (0.05, 0.17)  | <0.001          | 0.18         | (-0.10, 0.46) | 0.19            |
| Q3                                  | 0.21       | (0.14, 0.27)  | <0.001          | 0.29         | (0.01, 0.58)  | 0.047           |
| Q4                                  | 0.28       | (0.21, 0.35)  | <0.001          | 0.34         | 0.04, 0.66)   | 0.027           |
| <i>P</i> for trend                  |            |               | <0.001          |              |               | 0.022           |
| LDL-C (per SD increase)             | 0.10       | (0.08, 0.12)  | <0.001          | 0.19         | (0.08, 0.31)  | 0.001           |
| LDL in quartiles                    |            |               |                 |              |               |                 |
| Q1                                  | Ref        |               |                 | Ref          |               |                 |
| Q2                                  | 0.10       | (0.04, 0.16)  | 0.001           | 0.17         | (-0.10, 0.45) | 0.22            |
| Q3                                  | 0.16       | (0.10, 0.23)  | <0.001          | 0.22         | (-0.07, 0.52) | 0.14            |
| Q4                                  | 0.25       | (0.18, 0.31)  | <0.001          | 0.58         | (0.24, 0.91)  | 0.001           |
| <i>P</i> for trend                  |            |               | <0.001          |              |               | 0.001           |
| Triglycerides (per SD increase)     | -0.01      | (-0.03, 0.01) | 0.35            | -0.01        | (-0.11, 0.09) | 0.78            |
| Triglycerides in quartiles          |            |               |                 |              |               |                 |
| Q1                                  | Ref        |               |                 | Ref          |               |                 |
| Q2                                  | 0.06       | (0.00, 0.12)  | 0.04            | -0.04        | (-0.31, 0.23) | 0.76            |
| Q3                                  | 0.01       | (-0.05, 0.08) | 0.65            | 0.02         | (-0.25, 0.29) | 0.89            |
| Q4                                  | -0.01      | (-0.07, 0.05) | 0.73            | -0.01        | (-0.28, 0.28) | 0.99            |
| <i>P</i> for trend                  |            |               | 0.86            |              |               | 0.90            |

Analyses adjusted for age, sex, ethnicity, Townsend deprivation index, body mass index, height, systolic blood pressure, smoking, alcohol and diabetes status, statin use, oral beta-blocker use and spherical equivalent. Quartiles in UK Biobank are defined as follows: for TC: Q1  $\leq$  4.88, Q2 4.89-5.62, Q3 5.63-6.39, Q4  $\geq$  6.40; for HDL-C: Q1  $\leq$  1.18, Q2 1.19-1.41, Q3 1.42-1.69, Q4  $\geq$  1.70; for LDL-C: Q1  $\leq$  2.92, Q2 2.93-3.48, Q3 3.49-4.08, Q4  $\geq$  4.09, for TG: Q1  $\leq$  1.02, Q2 1.03-1.44, Q3 1.45-2.07, Q4  $\geq$  2.08. Quartiles for EPIC-Norfolk are defined as follows: for TC: Q1  $\leq$  4.67, Q2 4.68-5.49, Q3 5.50 - 6.19, Q4  $\geq$  6.20- 10.20; for HDL-C: Q1  $\leq$  1.21, Q2 1.22 - 1.46, Q3 1.47 - 1.77, Q4  $\geq$  1.78 for LDL-C: Q1  $\leq$  2.46, Q2 2.47 - 3.14, Q3 3.15 - 3.83, Q4  $\geq$  3.84 for TG: Q1  $\leq$  1.19, Q2 1.20 to 1.57, Q3 1.58 to 2.19, Q4  $\geq$  2.20
