# Supplementary material for: The Association between Serum Lipids and Intraocular Pressure in 2 Large United Kingdom Cohorts
Source: PubMed Central journal article supplement — Ophthalmology. 2022 Sep;129(9):986–96. doi: 10.1016/j.ophtha.2022.04.023 (PMC10444694; doi:10.1016/j.ophtha.2022.04.023), 2022-09
Supplement: mmc5.pdf [file mmc5.pdf]

**Supplementary Table S5** – Multivariable associations between lipid serum and corneal-compensated IOP (IOP<sub>cc</sub>) in statin users and non-statin users in EPIC Norfolk and UK Biobank cohorts

| <b>Statin Users</b>     | UK Biobank (17 930) |               |                | EPIC Norfolk (1 363) |               |                |
|-------------------------|---------------------|---------------|----------------|----------------------|---------------|----------------|
|                         | <i>B</i>            | 95%CI         | <i>P value</i> | <i>B</i>             | 95%CI         | <i>P value</i> |
| TC (per SD increase)    | 0.11                | (0.06, 0.17)  | <0.001         | 0.19                 | (0.07-0.31)   | 0.001          |
| HDL-C (per SD increase) | 0.11                | (0.05, 0.17)  | <0.001         | 0.14                 | (0.03-0.25)   | 0.016          |
| LDL-C (per SD increase) | 0.09                | (0.04, 0.15)  | 0.001          | 0.17                 | (0.06-0.29)   | 0.003          |
| TG (per SD increase)    | -0.02               | (-0.07, 0.03) | 0.423          | -0.05                | (-0.15, 0.05) | 0.287          |

  

| <b>Non Statin Users</b> | UK Biobank (76 393) |                |                | EPIC (4 867) |               |                |
|-------------------------|---------------------|----------------|----------------|--------------|---------------|----------------|
|                         | <i>B</i>            | 95%CI          | <i>P value</i> | <i>B</i>     | 95%CI         | <i>P value</i> |
| TC (per SD increase)    | 0.08                | (0.05, 0.10)   | <0.001         | 0.19         | (0.07-0.32)   | 0.003          |
| HDL-C (per SD increase) | 0.11                | (0.08, 0.13)   | <0.001         | 0.13         | (0.01, 0.25)  | 0.040          |
| LDL-C (per SD increase) | 0.07                | (0.04, 0.09)   | <0.001         | 0.18         | (0.06, 0.30)  | 0.004          |
| TG (per SD increase)    | -0.07               | (-0.09, -0.04) | <0.001         | -0.06        | (-0.17, 0.05) | 0.310          |

Analyses adjusted for age, sex, ethnicity, Townsend deprivation index, body mass index, height, systolic blood pressure, smoking, alcohol and diabetes status, oral beta-blocker use and spherical equivalent.
