# Supplementary material for: The Association between Serum Lipids and Intraocular Pressure in 2 Large United Kingdom Cohorts
Source: PubMed Central journal article supplement — Ophthalmology. 2022 Sep;129(9):986–96. doi: 10.1016/j.ophtha.2022.04.023 (PMC10444694; doi:10.1016/j.ophtha.2022.04.023), 2022-09
Supplement: mmc6.pdf [file mmc6.pdf]

**Supplementary Table S6.** Adjusted R<sup>2</sup> for proportion of IOP variance explained by serum lipids

| Serum lipid levels (mmol/L) | UK Biobank     |                                        | EPIC-Norfolk   |                                         |
|-----------------------------|----------------|----------------------------------------|----------------|-----------------------------------------|
|                             | R <sup>2</sup> | R <sup>2</sup> (age; sex) <sup>a</sup> | R <sup>2</sup> | R <sup>2</sup> (age + sex) <sup>a</sup> |
| TC                          | 0.001          | 0.033                                  | 0.002          | 0.019                                   |
| HDL-C                       | <0.001         | 0.032                                  | <0.001         | 0.015                                   |
| LDL-C                       | 0.001          | 0.032                                  | 0.002          | 0.018                                   |
| TG                          | 0.001          | 0.031                                  | <0.001         | 0.014                                   |

a. R<sup>2</sup> reported for multivariable analysis with IOPcc and given lipid variable and age and sex
