# Supplementary material for: The Association between Serum Lipids and Intraocular Pressure in 2 Large United Kingdom Cohorts
Source: PubMed Central journal article supplement — Ophthalmology. 2022 Sep;129(9):986–96. doi: 10.1016/j.ophtha.2022.04.023 (PMC10444694; doi:10.1016/j.ophtha.2022.04.023), 2022-09
Supplement: mmc7.pdf [file mmc7.pdf]

**Supplementary Table S7.** Baseline characteristics of included vs excluded UKBB participants with available IOP measurements

|                                                 | UKBB included<br>participants | UKBB excluded<br>Participants <sup>a</sup> | <i>P</i> -value |
|-------------------------------------------------|-------------------------------|--------------------------------------------|-----------------|
| Sample size                                     | 94 323                        | 33 857                                     |                 |
| Age (years), mean (SD)                          | 56.8 (8.0)                    | 56.9 (8.1)                                 | 0.052           |
| Sex, n (%)                                      |                               |                                            |                 |
| Men                                             | 44 286 (46.9)                 | 14 953 (44.2)                              |                 |
| Women                                           | 50 037 (53.1)                 | 18 904 (55.8)                              | <0.001          |
| Ethnicity, n (%)                                |                               |                                            |                 |
| White                                           | 85 947 (91.1)                 | 29 421 (89.2)                              |                 |
| Non-white                                       | 8 376 (8.9)                   | 3 555 (10.8)                               | <0.001          |
| Townsend deprivation index, mean (SD)           | -1.1 (3.0)                    | -0.88 (3.1)                                | <0.001          |
| Body mass index (kg/m <sup>2</sup> ), mean (SD) | 27.3 (4.3)                    | 27.3 (4.5)                                 | 0.20            |
| Height                                          | 168.8 (9.2)                   | 168.1 (9.2)                                | <0.001          |
| Smoking status, n (%)                           |                               |                                            |                 |
| Never smoked                                    | 52 673 (55.8)                 | 18 427 (55.6)                              |                 |
| Ever smoked                                     | 41 650 (44.2)                 | 14 703 (44.4)                              | 0.67            |
| Alcohol status, n (%)                           |                               |                                            |                 |
| Non-drinker                                     | 7 736 (8.2)                   | 3 206 (9.6)                                |                 |
| Drinker                                         | 86 587 (91.8)                 | 30 181 (90.4)                              | <0.001          |
| Diabetes status, n (%)                          |                               |                                            |                 |
| No                                              | 89 650 (95.0)                 | 31 221 (92.2)                              |                 |
| Yes                                             | 4 673 (5.0)                   | 2 636 (7.8)                                | <0.001          |
| Systolic blood pressure (mmHg), mean (SD)       | 137.3 (17.6)                  | 137.2 (17.8)                               | 0.37            |
| Total cholesterol (mmol/L), mean (SD)           |                               |                                            |                 |
| Men                                             | 5.4 (1.1)                     | 5.4 (1.1)                                  | 0.99            |
| Women                                           | 5.9 (1.1)                     | 5.7 (1.1)                                  | <0.001          |
| HDL-C (mmol/L), mean (SD)                       |                               |                                            |                 |
| Males                                           | 1.3 (0.3)                     | 1.3 (0.4)                                  | 0.99            |
| Females                                         | 1.6 (0.4)                     | 1.6 (0.4)                                  | 0.99            |
| LDL-C (mmol/L), mean (SD)                       |                               |                                            |                 |
| Men                                             | 3.5 (0.8)                     | 3.4 (0.9)                                  | <0.001          |
| Women                                           | 3.6 (0.8)                     | 3.5 (0.8)                                  | <0.001          |
| Triglycerides (mmol/L), mean (SD)               |                               |                                            |                 |
| Men                                             | 1.9 (1.0)                     | 1.8 (1.0)                                  | <0.001          |
| Women                                           | 1.5 (0.8)                     | 1.5 (0.8)                                  | 0.99            |
| Statin use                                      |                               |                                            |                 |
| Non-user                                        | 76 393 (81.0)                 | 26 608 (78.6)                              |                 |

|                          |               |               |        |
|--------------------------|---------------|---------------|--------|
| User                     | 17 930 (19.0) | 7 249 (21.4)  | <0.001 |
| Oral beta-blocker use    |               |               |        |
| Non-user                 | 88 977 (94.3) | 31 528 (93.1) |        |
| User                     | 5 346 (5.7)   | 2 329 (6.9)   | <0.001 |
| IOPcc (mmHg)             | 16.1 (3.3)    | 16.0 (3.5)    | 0.09   |
| IOPg (mmHg)              | 15.9 (3.4)    | 15.9 (3.4)    | 0.65   |
| Spherical Equivalent (D) | -0.33 (2.7)   | -0.34 (2.8)   | 0.60   |

---

a. Participants with missing data on any of the covariables and participants who were excluded due to previous glaucoma surgery. SD, standard deviation; HDL-C, high density lipoprotein; LDL-C, low density lipoprotein; IOPcc, corneal-compensated intraocular pressure; IOPg, Goldmann-correlated intraocular pressure; mmHg, millimeters of mercury; D, diopters
