# Supplementary material for: The Association between Serum Lipids and Intraocular Pressure in 2 Large United Kingdom Cohorts
Source: PubMed Central journal article supplement — Ophthalmology. 2022 Sep;129(9):986–96. doi: 10.1016/j.ophtha.2022.04.023 (PMC10444694; doi:10.1016/j.ophtha.2022.04.023), 2022-09
Supplement: mmc8.pdf [file mmc8.pdf]

## **List of members of the Modifiable Risk Factors for Glaucoma Collaboration**

Hugues Aschard, Institute Pasteur, Paris, France

Mark Chia, Moorfields Eye Hospital NHS Foundation Trust & UCL Institute of Ophthalmology, London, UK

Sharon Y.L. Chua, Moorfields Eye Hospital NHS Foundation Trust & UCL Institute of Ophthalmology, London, UK

Ron Do, Icahn School of Medicine at Mount Sinai, New York, NY, USA

Paul J. Foster, Moorfields Eye Hospital NHS Foundation Trust & UCL Institute of Ophthalmology, London, UK

Jae H. Kang, Brigham and Women's Hospital, Harvard Medical School, Boston, MA, USA

Alan Kastner, Moorfields Eye Hospital NHS Foundation Trust, London, UK

Anthony P. Khawaja, Moorfields Eye Hospital NHS Foundation Trust & UCL Institute of Ophthalmology, London, UK

Jihye Kim, Harvard T.H. Chan School of Public Health, Boston, MA, USA

Marleen A.H. Lentjes, Örebro University, Campus USÖ, Örebro, Sweden

Robert N. Luben, University of Cambridge School of Clinical Medicine, Cambridge, UK

Kian M. Madjedi, Moorfields Eye Hospital NHS Foundation Trust & UCL Institute of Ophthalmology, London, UK; University of Calgary, Alberta, Canada

Giovanni Montesano, Moorfields Eye Hospital NHS Foundation Trust, London, UK

Louis R. Pasquale, Icahn School of Medicine at Mount Sinai, New York, NY, USA

Kelsey V. Stuart, Moorfields Eye Hospital NHS Foundation Trust & UCL Institute of Ophthalmology, London, UK

Alasdair N. Warwick, UCL Institute of Cardiovascular Science, London, UK

Janey L. Wiggs, Massachusetts Eye and Ear Infirmary, Harvard Medical School, Boston, MA, USA

## UK Biobank Eye and Vision Consortium Membership

The UK Biobank Eye and Vision Consortium members are:

Denize Atan, PhD, University of Bristol; Tariq Aslam, PhD, Manchester University; Sarah A. Barman, PhD, Kingston University; Jenny H. Barrett, PhD, University of Leeds; Paul Bishop, PhD, Manchester University; Peter Blows, BSc, NIHR Biomedical Research Centre; Catey Bunce, DSc, King's College London; Roxana O. Carare, PhD, University of Southampton; Usha Chakravarthy, FRCOphth, Queens University Belfast; Michelle Chan, FRCOphth, NIHR Biomedical Research Centre; Sharon Y.L. Chua, PhD, NIHR Biomedical Research Centre; David P. Crabb, PhD, UNIVERSITY COLLEGE LONDON; Philippa M. Cumberland, MSc, UNIVERSITY COLLEGE LONDON Great Ormond Street Institute of Child Health; Alexander Day, PhD, NIHR Biomedical Research Centre; Parul Desai, PhD, NIHR Biomedical Research Centre; Bal Dhillon, FRCOphth, University of Edinburgh; Andrew D. Dick, FRCOphth, University of Bristol; Cathy Egan, FRCOphth, NIHR Biomedical Research Centre; Sarah Ennis, PhD, University of Southampton; Paul Foster, PhD, NIHR Biomedical Research Centre; Marcus Fruttiger, PhD, NIHR Biomedical Research Centre; John E.J. Gallacher, PhD, University of Oxford; David F. Garway-Heath FRCOphth- NIHR Biomedical Research Centre; Jane Gibson, PhD, University of Southampton; Dan Gore, FRCOphth, NIHR Biomedical Research Centre; Jeremy A. Guggenheim, PhD, Cardiff University; Chris J. Hammond, FRCOphth, King's College London; Alison Hardcastle, PhD, NIHR Biomedical Research Centre; Simon P. Harding, MD, University of Liverpool; Ruth E. Hogg, PhD, Queens University Belfast; Pirro Hysi, PhD, King's College London; Pearse A. Keane, MD, NIHR Biomedical Research Centre; Sir Peng T. Khaw, PhD, NIHR Biomedical Research Centre; Anthony P. Khawaja, DPhil, NIHR Biomedical Research Centre; Gerassimos Lascaratos, PhD, NIHR Biomedical Research Centre; Andrew J. Lotery, MD, University of Southampton; Tom Macgillivray, PhD, University of Edinburgh; Sarah Mackie, PhD, University of Leeds; Keith Martin, FRCOphth, University of Cambridge; Michelle McGaughey, Queen's University Belfast; Bernadette McGuinness, PhD, Queen's

University Belfast; Gareth J. McKay, PhD, Queen's University Belfast; Martin McKibbin, FRCOphth, Leeds Teaching Hospitals NHS Trust; Danny Mitry, PhD, NIHR Biomedical Research Centre; Tony Moore, FRCOphth, NIHR Biomedical Research Centre; James E. Morgan, DPhil, Cardiff University; Zaynah A. Muthy, BSc, NIHR Biomedical Research Centre; Eoin O'Sullivan, MD, King's College Hospital NHS Foundation Trust; Chris G. Owen, PhD, University of London; Praveen Patel, FRCOphth, NIHR Biomedical Research Centre; Euan Paterson, BSc, Queens University Belfast; Tunde Peto, PhD, Queen's University Belfast; Axel Petzold, PhD, University College London; Jugnoo S. Rahi, PhD, UCL Great Ormond Street Institute of Child Health; Alicja R. Rudnikca, PhD, University of London; Jay Self, PhD, University of Southampton; Sobha Sivaprasad, FRCOphth, NIHR Biomedical Research Centre; David Steel, FRCOphth, Newcastle University; Irene Stratton, MSc, Gloucestershire Hospitals NHS Foundation Trust; Nicholas Strouthidis, PhD, NIHR Biomedical Research Centre; Cathie Sudlow, DPhil, University of Edinburgh; Dhanes Thomas, FRCOphth, NIHR Biomedical Research Centre; Emanuele Trucco, PhD, University of Dundee; Adnan Tufail, FRCOphth, NIHR Biomedical Research Centre; Veronique Vitart, PhD, University of Edinburgh; Stephen A. Vernon, DM, Nottingham University Hospitals NHS Trust; Ananth C. Viswanathan, FRCOphth, NIHR Biomedical Research Centre; Cathy Williams, PhD, University of Bristol; Katie Williams, PhD, King's College London; Jayne V. Woodside, MRCOphth, PhD, Queen's University Belfast; Max M. Yates, PhD, University of East Anglia; Jennifer Yip, PhD, University of Cambridge; and Yalin Zheng, PhD, University of Liverpool.
